# Supplementary material
Source: publisher site journal article supplement (https://www.spandidos-publications.com/7283/downloadSupplementary)
Supplement: Supplementary file 1 [file downloadSupplementary]

## Sheet: Diff_distribution
Table SIV Different proteins
Upregulated	Downregulated
14	0

## Sheet: Supplementary Table4
Protein accession	Protein description	Gene name	SLC4A7/Vector Ratio	SLC4A7/Vector P value	Regulated Type	MW [kDa]	Coverage [%]	Peptides	Unique peptides	Razor + unique peptides	Razor + unique peptides Vector_1	Razor + unique peptides Vector_2	Razor + unique peptides Vector_3	Razor + unique peptides SLC4A7_1	Razor + unique peptides SLC4A7_2	Razor + unique peptides SLC4A7_3	iBAQ Vector_1	iBAQ Vector_2	iBAQ Vector_3	iBAQ SLC4A7_1	iBAQ SLC4A7_2	iBAQ SLC4A7_3	Relative intensity Vector_1	Relative intensity Vector_2	Relative intensity Vector_3	Relative intensity SLC4A7_1	Relative intensity SLC4A7_2	Relative intensity SLC4A7_3	Subcellular localization	KEGG KO No.	KEGG Gene	KEGG pathway	Biological Process	Cellular Component	Molecular Function	Pfam ID	Domain description	KOG category	KOG NO.	KOG description
O94953	Lysine-specific demethylase 4B OS=Homo sapiens OX=9606 GN=KDM4B PE=1 SV=4	KDM4B	1.646	0.0302271	Up	121.9	2.9	2	2	2	1	2	2	2	2	2	311.42	582.6	358.12	647.04	690.69	689.16		0.828787	0.612697	1.143	1.10733	1.30818	nucleus	K06709			GO:0006325 chromatin organization; GO:0006464 cellular protein modification process; GO:0006482 protein demethylation; GO:0006807 nitrogen compound metabolic process; GO:0006996 organelle organization; GO:0008152 metabolic process; GO:0008214 protein dealkylation; GO:0009892 negative regulation of metabolic process; GO:0009987 cellular process; GO:0010605 negative regulation of macromolecule meta…	GO:0000228 nuclear chromosome; GO:0000775 chromosome, centromeric region; GO:0000785 chromatin; GO:0000790 nuclear chromatin; GO:0000792 heterochromatin; GO:0005622 intracellular; GO:0005623 cell; GO:0005634 nucleus; GO:0005654 nucleoplasm; GO:0005694 chromosome; GO:0005720 nuclear heterochromatin; GO:0005721 pericentric heterochromatin; GO:0005737 cytoplasm; GO:0005829 cytosol; GO:0031618 nuclea…	GO:0003824 catalytic activity; GO:0016491 oxidoreductase activity; GO:0016705 oxidoreductase activity, acting on paired donors, with incorporation or reduction of molecular oxygen; GO:0016706 2-oxoglutarate-dependent dioxygenase activity; GO:0032451 demethylase activity; GO:0032452 histone demethylase activity; GO:0032454 histone demethylase activity (H3-K9 specific); GO:0051213 dioxygenase activ…	PF02373; PF13832	JmjC domain, hydroxylase; PHD-zinc-finger like domain	K	KOG0958	DNA damage-responsive repressor GIS1/RPH1, jumonji superfamily
O95671	Probable bifunctional dTTP/UTP pyrophosphatase/methyltransferase protein OS=Homo sapiens OX=9606 GN=ASMTL PE=1 SV=3	ASMTL	1.572	0.00636339	Up	68.856	22.1	10	10	10	6	5	6	9	7	7	3980.3	3225.1	2977.6	6384.6	5207	5031.2	0.899107	0.708738	0.724993	1.18868	1.15134	1.32713	mitochondria	K25435	ASMTL; putative bifunctional nucleoside triphosphate pyrophosphatase / methyltransferase [EC:3.6.1.- 2.1.1.-]	hsa00240 Pyrimidine metabolism; hsa01100 Metabolic pathways		GO:0005622 intracellular; GO:0005623 cell; GO:0005737 cytoplasm; GO:0005829 cytosol;		PF02545; PF00891	Maf-like protein; O-methyltransferase	D	KOG3178	Hydroxyindole-O-methyltransferase and related SAM-dependent methyltransferases
P01024	Complement C3 OS=Homo sapiens OX=9606 GN=C3 PE=1 SV=2	C3	1.84	0.0354043	Up	187.15	10.9	13	13	13	9	10	5	10	12	12	2282.3	2901.8	1349.1	3272.9	5700.1	5822.9	0.733159	0.786776	0.592947	0.905038	1.41446	1.56761	endoplasmic reticulum	K03990	C3; complement component 3	hsa05203 Viral carcinogenesis; hsa05131 Shigellosis; hsa05322 Systemic lupus erythematosus; hsa05168 Herpes simplex virus 1 infection; hsa05171 Coronavirus disease - COVID-19; hsa04080 Neuroactive ligand-receptor interaction; hsa04936 Alcoholic liver disease; hsa04613 Neutrophil extracellular trap formation; hsa05152 Tuberculosis; hsa05150 Staphylococcus aureus infection; hsa04610 Complement and …	GO:0001775 cell activation; GO:0001796 regulation of type IIa hypersensitivity; GO:0001798 positive regulation of type IIa hypersensitivity; GO:0001817 regulation of cytokine production; GO:0001819 positive regulation of cytokine production; GO:0001932 regulation of protein phosphorylation; GO:0001934 positive regulation of protein phosphorylation; GO:0001969 regulation of activation of membrane …	GO:0000323 lytic vacuole; GO:0005576 extracellular region; GO:0005615 extracellular space; GO:0005622 intracellular; GO:0005623 cell; GO:0005737 cytoplasm; GO:0005764 lysosome; GO:0005766 primary lysosome; GO:0005773 vacuole; GO:0005775 vacuolar lumen; GO:0005783 endoplasmic reticulum; GO:0005788 endoplasmic reticulum lumen; GO:0005886 plasma membrane; GO:0012505 endomembrane system; GO:0016020 m…	GO:0001664 G protein-coupled receptor binding; GO:0003824 catalytic activity; GO:0004175 endopeptidase activity; GO:0004252 serine-type endopeptidase activity; GO:0005102 signaling receptor binding; GO:0005488 binding; GO:0005515 protein binding; GO:0008233 peptidase activity; GO:0008236 serine-type peptidase activity; GO:0008289 lipid binding; GO:0016787 hydrolase activity; GO:0017171 serine hyd…	PF01835; PF07703; PF01821; PF07678; PF07677; PF01759	MG2 domain; Alpha-2-macroglobulin family N-terminal region; Anaphylotoxin-like domain; A-macroglobulin complement component; A-macroglobulin receptor; UNC-6/NTR/C345C module	O	KOG1366	Alpha-macroglobulin
P28300	Protein-lysine 6-oxidase OS=Homo sapiens OX=9606 GN=LOX PE=1 SV=2	LOX	2.361	0.0477812	Up	46.944	19.2	5	5	5	2	4	3	2	5	5	4433.1	4324.1	4174.6	4544.5	8896.3	12104	0.842977	0.421733	0.520336	0.857799	1.64769	1.70947	extracellular	K00277			GO:0001568 blood vessel development; GO:0001944 vasculature development; GO:0006464 cellular protein modification process; GO:0006807 nitrogen compound metabolic process; GO:0006950 response to stress; GO:0007275 multicellular organism development; GO:0007507 heart development; GO:0008152 metabolic process; GO:0009611 response to wounding; GO:0009653 anatomical structure morphogenesis; GO:0009719…	GO:0005576 extracellular region; GO:0005581 collagen trimer; GO:0005615 extracellular space; GO:0005622 intracellular; GO:0005623 cell; GO:0005634 nucleus; GO:0031012 extracellular matrix; GO:0032991 protein-containing complex; GO:0043226 organelle; GO:0043227 membrane-bounded organelle; GO:0043229 intracellular organelle; GO:0043231 intracellular membrane-bounded organelle;	GO:0003824 catalytic activity; GO:0004720 protein-lysine 6-oxidase activity; GO:0005488 binding; GO:0005507 copper ion binding; GO:0016491 oxidoreductase activity; GO:0016638 oxidoreductase activity, acting on the CH-NH2 group of donors; GO:0016641 oxidoreductase activity, acting on the CH-NH2 group of donors, oxygen as acceptor; GO:0043167 ion binding; GO:0043169 cation binding; GO:0046872 metal…
P35869	Aryl hydrocarbon receptor OS=Homo sapiens OX=9606 GN=AHR PE=1 SV=2	AHR	1.56	0.0131721	Up	96.146	11.4	6	6	6	3	3	2	4	4	5	1711	1505	893.63	3270.8	2941.7	2868.7	0.836806	0.718597	0.788429	1.36719	1.00689	1.28209	nucleus	K09093	AHR; aryl hydrocarbon receptor	hsa05208 Chemical carcinogenesis - reactive oxygen species; hsa04934 Cushing syndrome; hsa05207 Chemical carcinogenesis - receptor activation; hsa04659 Th17 cell differentiation	GO:0000003 reproduction; GO:0000122 negative regulation of transcription by RNA polymerase II; GO:0000902 cell morphogenesis; GO:0001525 angiogenesis; GO:0001541 ovarian follicle development; GO:0001568 blood vessel development; GO:0001569 branching involved in blood vessel morphogenesis; GO:0001654 eye development; GO:0001655 urogenital system development; GO:0001763 morphogenesis of a branching…	GO:0005622 intracellular; GO:0005623 cell; GO:0005634 nucleus; GO:0005654 nucleoplasm; GO:0005667 transcription regulator complex; GO:0005737 cytoplasm; GO:0005829 cytosol; GO:0031974 membrane-enclosed lumen; GO:0031981 nuclear lumen; GO:0032991 protein-containing complex; GO:0034751 aryl hydrocarbon receptor complex; GO:0034752 cytosolic aryl hydrocarbon receptor complex; GO:0034753 nuclear aryl…	GO:0000976 transcription regulatory region sequence-specific DNA binding; GO:0000977 RNA polymerase II transcription regulatory region sequence-specific DNA binding; GO:0000978 RNA polymerase II cis-regulatory region sequence-specific DNA binding; GO:0000981 DNA-binding transcription factor activity, RNA polymerase II-specific; GO:0000987 cis-regulatory region sequence-specific DNA binding; GO:00…	PF00010; PF00989; PF08447	Helix-loop-helix DNA-binding domain; PAS fold; PAS fold	K	KOG3560	Aryl-hydrocarbon receptor
P42330	Aldo-keto reductase family 1 member C3 OS=Homo sapiens OX=9606 GN=AKR1C3 PE=1 SV=4	AKR1C3	1.814	0.0399673	Up	36.853	43.7	9	5	5	4	4	3	4	5	5	6185	8259.2	4904.6	9219.6	11856	13949	0.662344	0.889714	0.58008	0.988884	1.21965	1.65933	cytoplasm	K04119	AKR1C3; aldo-keto reductase family 1 member C3 [EC:1.1.1.51 1.1.1.188 1.1.1.213 1.1.1.357]	hsa00140 Steroid hormone biosynthesis; hsa00790 Folate biosynthesis; hsa04913 Ovarian steroidogenesis; hsa05208 Chemical carcinogenesis - reactive oxygen species; hsa00590 Arachidonic acid metabolism; hsa01100 Metabolic pathways	GO:0000003 reproduction; GO:0000302 response to reactive oxygen species; GO:0001101 response to acid chemical; GO:0001516 prostaglandin biosynthetic process; GO:0001523 retinoid metabolic process; GO:0001676 long-chain fatty acid metabolic process; GO:0003006 developmental process involved in reproduction; GO:0003008 system process; GO:0003014 renal system process; GO:0006066 alcohol metabolic pr…	GO:0005622 intracellular; GO:0005623 cell; GO:0005634 nucleus; GO:0005737 cytoplasm; GO:0005829 cytosol; GO:0043226 organelle; GO:0043227 membrane-bounded organelle; GO:0043229 intracellular organelle; GO:0043231 intracellular membrane-bounded organelle;	GO:0000166 nucleotide binding; GO:0001758 retinal dehydrogenase activity; GO:0003824 catalytic activity; GO:0004032 alditol:NADP+ 1-oxidoreductase activity; GO:0004033 aldo-keto reductase (NADP) activity; GO:0004303 estradiol 17-beta-dehydrogenase activity; GO:0004497 monooxygenase activity; GO:0004745 retinol dehydrogenase activity; GO:0005215 transporter activity; GO:0005319 lipid transporter a…	PF00248	Aldo/keto reductase family	C	KOG1577	Aldo/keto reductase family proteins
P53677	AP-3 complex subunit mu-2 OS=Homo sapiens OX=9606 GN=AP3M2 PE=1 SV=1	AP3M2	1.597	0.0246446	Up	46.977	12.2	3	3	3	3	1	3	2	3	2	1506.7	1087.7	1386.4	1317.8	2219.7	1626.1	0.754899		0.717829	1.08163	1.06564	1.38	cytoplasm	K12398	AP3M; AP-3 complex subunit mu	hsa04142 Lysosome	GO:0006810 transport; GO:0006928 movement of cell or subcellular component; GO:0007017 microtubule-based process; GO:0007018 microtubule-based movement; GO:0008088 axo-dendritic transport; GO:0008089 anterograde axonal transport; GO:0009987 cellular process; GO:0010970 transport along microtubule; GO:0016192 vesicle-mediated transport; GO:0030705 cytoskeleton-dependent intracellular transport; GO…	GO:0005622 intracellular; GO:0005623 cell; GO:0005737 cytoplasm; GO:0016020 membrane; GO:0030117 membrane coat; GO:0030119 AP-type membrane coat adaptor complex; GO:0032991 protein-containing complex; GO:0048475 coated membrane; GO:0098796 membrane protein complex;		PF01217	Clathrin adaptor complex small chain	U	KOG2740	Clathrin-associated protein medium chain
Q13308	Inactive tyrosine-protein kinase 7 OS=Homo sapiens OX=9606 GN=PTK7 PE=1 SV=2	PTK7	1.571	0.0200562	Up	118.39	15.7	10	10	10	6	7	4	10	7	7	2728.4	2879.5	1808.2	5653.1	4063.4	3050.9	0.896512	0.772458	0.664381	1.39759	1.22516	1.04389	extracellular	K05127			GO:0001101 response to acid chemical; GO:0001568 blood vessel development; GO:0001736 establishment of planar polarity; GO:0001738 morphogenesis of a polarized epithelium; GO:0001838 embryonic epithelial tube formation; GO:0001841 neural tube formation; GO:0001843 neural tube closure; GO:0001944 vasculature development; GO:0002009 morphogenesis of an epithelium; GO:0003205 cardiac chamber develop…	GO:0005623 cell; GO:0005886 plasma membrane; GO:0005887 integral component of plasma membrane; GO:0005911 cell-cell junction; GO:0016020 membrane; GO:0016021 integral component of membrane; GO:0030054 cell junction; GO:0031224 intrinsic component of membrane; GO:0031226 intrinsic component of plasma membrane; GO:0071944 cell periphery;	GO:0015026 coreceptor activity; GO:0038023 signaling receptor activity; GO:0060089 molecular transducer activity; GO:0071936 coreceptor activity involved in Wnt signaling pathway; GO:1904929 coreceptor activity involved in Wnt signaling pathway, planar cell polarity pathway;	PF13927; PF07679; PF07714	Immunoglobulin domain; Immunoglobulin I-set domain; Protein tyrosine kinase	T	KOG4475	FOG: Immunoglobin and related proteins
Q8IY22	C-Maf-inducing protein OS=Homo sapiens OX=9606 GN=CMIP PE=1 SV=3	CMIP	1.717	0.0494968	Up	86.33	5.7	3	3	3	3	2	3	3	3	2	537.97	475.45	881.09	862.86	1111.4	945.04	0.567124	0.703329	0.938118	0.995322	1.23329	1.56282	cytoplasm					GO:0005622 intracellular; GO:0005623 cell; GO:0005634 nucleus; GO:0005654 nucleoplasm; GO:0005737 cytoplasm; GO:0005829 cytosol; GO:0031974 membrane-enclosed lumen; GO:0031981 nuclear lumen; GO:0043226 organelle; GO:0043227 membrane-bounded organelle; GO:0043229 intracellular organelle; GO:0043231 intracellular membrane-bounded organelle; GO:0043233 organelle lumen; GO:0070013 intracellular organ…
Q92597	Protein NDRG1 OS=Homo sapiens OX=9606 GN=NDRG1 PE=1 SV=1	NDRG1	1.788	0.00595556	Up	42.835	50.5	12	11	12	9	10	11	11	11	12	197860	250720	218960	342100	390430	427440	0.620282	0.79793	0.733714	1.13237	1.23237	1.48333	cytoplasm,nucleus	K18266			GO:0001666 response to hypoxia; GO:0001775 cell activation; GO:0002274 myeloid leukocyte activation; GO:0002376 immune system process; GO:0006950 response to stress; GO:0006974 cellular response to DNA damage stimulus; GO:0007009 plasma membrane organization; GO:0007154 cell communication; GO:0007165 signal transduction; GO:0007272 ensheathment of neurons; GO:0007275 multicellular organism develo…	GO:0005622 intracellular; GO:0005623 cell; GO:0005634 nucleus; GO:0005737 cytoplasm; GO:0005768 endosome; GO:0005813 centrosome; GO:0005815 microtubule organizing center; GO:0005829 cytosol; GO:0005856 cytoskeleton; GO:0005874 microtubule; GO:0005886 plasma membrane; GO:0005911 cell-cell junction; GO:0005912 adherens junction; GO:0010008 endosome membrane; GO:0012505 endomembrane system; GO:00156…	GO:0005488 binding; GO:0005515 protein binding; GO:0008017 microtubule binding; GO:0008092 cytoskeletal protein binding; GO:0015631 tubulin binding; GO:0017016 Ras GTPase binding; GO:0017137 Rab GTPase binding; GO:0019899 enzyme binding; GO:0031267 small GTPase binding; GO:0043015 gamma-tubulin binding; GO:0045296 cadherin binding; GO:0050839 cell adhesion molecule binding; GO:0051020 GTPase bind…	PF03096	Ndr family	S	KOG2931	Differentiation-related gene 1 protein (NDR1 protein), related proteins
Q96BX8	MOB kinase activator 3A OS=Homo sapiens OX=9606 GN=MOB3A PE=1 SV=1	MOB3A	1.648	0.00470709	Up	25.464	27.2	4	4	4	3	3	2	2	3	4	5399.7	5723.3	5896.7	9385.4	8665.3	9303.4	0.679722	0.747143	0.839309	1.32517	1.09302	1.31563	nucleus					GO:0005622 intracellular; GO:0005623 cell;				D	KOG1903	Cell cycle-associated protein
Q9NPH2	Inositol-3-phosphate synthase 1 OS=Homo sapiens OX=9606 GN=ISYNA1 PE=1 SV=1	ISYNA1	1.988	0.00661562	Up	61.067	16.8	5	5	5	4	4	2	5	5	5	5601.1	3078.8	1877.4	11998	11838	9535.7	0.84225	0.588539	0.577462	1.47769	1.2225	1.29156	nucleus	K01858	INO1; myo-inositol-1-phosphate synthase [EC:5.5.1.4]	hsa00562 Inositol phosphate metabolism; hsa01100 Metabolic pathways	GO:0005975 carbohydrate metabolic process; GO:0006020 inositol metabolic process; GO:0006021 inositol biosynthetic process; GO:0006066 alcohol metabolic process; GO:0006793 phosphorus metabolic process; GO:0006796 phosphate-containing compound metabolic process; GO:0008152 metabolic process; GO:0009058 biosynthetic process; GO:0009987 cellular process; GO:0016051 carbohydrate biosynthetic process…	GO:0005622 intracellular; GO:0005623 cell; GO:0005737 cytoplasm; GO:0005829 cytosol;	GO:0003824 catalytic activity; GO:0004512 inositol-3-phosphate synthase activity; GO:0016853 isomerase activity; GO:0016872 intramolecular lyase activity;			I	KOG0693	Myo-inositol-1-phosphate synthase
Q9NSK0	Kinesin light chain 4 OS=Homo sapiens OX=9606 GN=KLC4 PE=1 SV=3	KLC4	1.824	0.0268285	Up	68.639	12.4	6	3	3	3	2	1	3	3	2	648.79	469.01	188.72	1629.5	1216.3	776.42	0.561026	0.777522		1.34377	1.06775	1.24994	nucleus	K10407	KLC; kinesin light chain	hsa05132 Salmonella infection; hsa05016 Huntington disease; hsa05022 Pathways of neurodegeneration - multiple diseases; hsa05014 Amyotrophic lateral sclerosis; hsa05020 Prion disease; hsa05012 Parkinson disease; hsa05010 Alzheimer disease						Z	KOG1840	Kinesin light chain
Q9Y6M7	Sodium bicarbonate cotransporter 3 OS=Homo sapiens OX=9606 GN=SLC4A7 PE=1 SV=2	SLC4A7	11.536	7.35598e-05	Up	136.04	32.2	32	32	32	16	13	12	32	31	30	18588	11704	11608	236360	178740	197330	0.195096	0.137145	0.146395	2.14879	1.53328	1.83929	plasma membrane	K13858			GO:0001654 eye development; GO:0001754 eye photoreceptor cell differentiation; GO:0001944 vasculature development; GO:0002064 epithelial cell development; GO:0002065 columnar/cuboidal epithelial cell differentiation; GO:0002066 columnar/cuboidal epithelial cell development; GO:0003008 system process; GO:0003407 neural retina development; GO:0006810 transport; GO:0006811 ion transport; GO:0006812 …	GO:0005622 intracellular; GO:0005623 cell; GO:0005737 cytoplasm; GO:0005886 plasma membrane; GO:0005887 integral component of plasma membrane; GO:0016020 membrane; GO:0016021 integral component of membrane; GO:0016323 basolateral plasma membrane; GO:0016324 apical plasma membrane; GO:0031224 intrinsic component of membrane; GO:0031226 intrinsic component of plasma membrane; GO:0031410 cytoplasmic…	GO:0005215 transporter activity; GO:0008324 cation transmembrane transporter activity; GO:0008509 anion transmembrane transporter activity; GO:0008510 sodium:bicarbonate symporter activity; GO:0008514 organic anion transmembrane transporter activity; GO:0015075 ion transmembrane transporter activity; GO:0015077 monovalent inorganic cation transmembrane transporter activity; GO:0015081 sodium ion …	PF07565	Band 3 cytoplasmic domain	P	KOG1172	Na+-independent Cl/HCO3 exchanger AE1 and related transporters (SLC4 family)
